# Supplementary material for: Application of the ICD-PM classification system to stillbirth in four sub-Saharan African countries
Source: PubMed Central journal article supplement (PMC6508706; doi:10.1371/journal.pone.0215864), 2019-05-09
Supplement: pone.0215864.s001.pdf [file pone.0215864.s001.pdf]

## PERINATAL DEATH REVIEW FORM

**Instructions:** Fill in this form for every perinatal death (i.e. stillbirth and neonatal death in the 1<sup>st</sup> week of life). The example of code below (SRL/FRT/01/01) represents “Sierra Leone/Freetown/January/1<sup>st</sup> case of perinatal death in the month of January”.

| Country | Date of Audit | Date of Data Collection | Code (E.g. SRL/FRT/01/01) |
|---------|---------------|-------------------------|---------------------------|
|         |               |                         |                           |

### SECTION 1: HEALTH FACILITY

**Name of Health Facility:** .....

**County / District / Region:** .....

**Type of Health Facility (tick one):**

| National                 | Referral / Teaching      | Regional                 | District                 | General                  | Health Centre            | Other (specify)<br>..... |
|--------------------------|--------------------------|--------------------------|--------------------------|--------------------------|--------------------------|--------------------------|
| <input type="checkbox"/> | <input type="checkbox"/> | <input type="checkbox"/> | <input type="checkbox"/> | <input type="checkbox"/> | <input type="checkbox"/> | <input type="checkbox"/> |

**Level of Health Facility (tick one):** BEmONC  CEmONC

**Is this a Helping Baby Breath (HBB) Facility?** Yes  No

### SECTION 2: MOTHER

**Mother's Initials:** ..... **Mother's Age:** ..... (in years)

**Mother's Address (tick one):** Rural  Semi-urban  Urban

**Mother's County / District:** .....

**Educational Level Completed (tick one):**

None

Primary

Secondary

Tertiary

Was mother referred from another facility? Yes  No

If Yes, from which facility? .....

**SECTION 3: PREGNANCY**

Mother's Parity: Para ..... + ..... No. of Children Alive .....

Type of pregnancy (tick one): Singleton  Multiple Gestation

Antenatal Care Attendance: Yes  No

If yes, how many visits? .....

Date of 1<sup>st</sup> Booking: .....

ANC Interventions (tick all that apply):

| Interventions                   | Yes | No | Follow-Up Questions                                  | Response to Follow-Up Questions |
|---------------------------------|-----|----|------------------------------------------------------|---------------------------------|
| Iron and Folate given?          |     |    | If yes, for how long?                                |                                 |
| Anti-malaria prophylaxis given? |     |    | If yes, how many doses?                              |                                 |
| Tetanus Toxoid given?           |     |    | If yes, how many doses?                              |                                 |
| HIV test done?                  |     |    | If yes, +ve or -ve result?<br>If +ve, on ARV?        |                                 |
| Syphilis test done?             |     |    | If yes, +ve or -ve result?<br>If +ve, any treatment? |                                 |
| Rhesus blood group checked?     |     |    | If yes, +ve or -ve result?<br>If RhD -ve, treatment? |                                 |

**Conditions present during this pregnancy (tick all that apply)**

| Conditions                                             | Yes | No | Follow-Up Questions       | Response to Follow-Up Questions |
|--------------------------------------------------------|-----|----|---------------------------|---------------------------------|
| Antepartum haemorrhage                                 |     |    | If yes, mention treatment |                                 |
| Malaria                                                |     |    | If yes, mention treatment |                                 |
| Hypertensive disorders (PIH, pre-eclampsia, eclampsia) |     |    | If yes, mention treatment |                                 |
| Diabetes                                               |     |    | If yes, mention treatment |                                 |
| Pre-mature rupture of membranes                        |     |    | If yes, mention treatment |                                 |
| Anaemia (Hb)                                           |     |    | If yes, mention treatment |                                 |
| Urinary tract infection                                |     |    | If yes, mention treatment |                                 |
| Trauma (due to accident or gender-based violence)      |     |    | If yes, mention treatment |                                 |
| Other (specify)                                        |     |    | If yes, mention treatment |                                 |

**SECTION 4: LABOUR AND BIRTH**

**Gestational Age** (in weeks): ..... **Cervical Dilatation on Admission:** ..... cm

**Reason for Admission:** .....

**Date of Admission** (DD/MM/YYYY): ..... **Time of Admission:** .....

**Date of Delivery** (DD/MM/YYYY): ..... **Time of Delivery:** .....

**Date of Discharge** (DD/MM/YYYY): .....

**Place of delivery** (tick one):

Health facility  (specify) .....

Home

TBA

Other  (specify) .....

**On admission, was foetal sound present?** Yes  No  Not assessed

**Was partograph used?** Yes  No  Unknown

If 'Yes', was partograph used correctly? Yes  No

If 'No', mention error: .....

**Any Obstetric Complications?** .....

.....

**Presentation** (tick one):

Cephalic

Breech

Others (specify): .....

**Mode of Delivery** (tick one):

Spontaneous Vaginal Delivery

Caesarean Section

Vacuum

Forceps

Others (specify): .....

Indication(s) for Instrumental / Caesarean Delivery: .....

.....

**Time between decisions for CS / instrumental and actual delivery of the baby:**

Less than 30 minutes

30 minutes - 1 hour

Greater than 1 hour  How Long? .....

Not documented

**Mother's Outcome:** Alive  Died

Any Morbidity? (Specify) .....

**SECTION 5: BABY'S CONDITION**

**Weight of the baby** (in grams): .....

**Sex:** Female  Male

**Baby's Condition at Birth:** Alive  Fresh Stillbirth  Macerated Stillbirth

**Any congenital anomaly noted:** .....

**Apgar Score:** At 1 minute: ..... At 5 minutes: ..... At 10 minutes: .....

**Resuscitation attempted with Ambu bag?** Yes  No

**If born alive, select one:** Kept with Mother  Referred

**If born alive, state when the baby died:** ..... (days or hours after delivery)

**SECTION 6: CAUSES AND AVOIDABLE FACTORS**

**Probable Cause(s) of Death:**

(E.g. congenital anomaly, HIV, hypertension, placenta previa, asphyxia, umbilical prolapse, ruptured uterus, etc.). If more than one cause, list the most likely cause(s) first.

1. ....
2. ....
3. ....
4. ....

**Avoidable Factors:** Use comment section for clarifications.

| Factors                                                       | Yes | No | Support with facts |
|---------------------------------------------------------------|-----|----|--------------------|
| Delay to seek health care                                     |     |    |                    |
| Delay to reach the health facility                            |     |    |                    |
| Delay to provide care after arrival at health facility        |     |    |                    |
| Was full complement of staff available during mother's stay?  |     |    |                    |
| Functional resuscitation equipment (e.g. ambu bag) available? |     |    |                    |
| Supplies and drugs (including blood) available?               |     |    |                    |
| Were instructions, guidelines and/or protocols followed?      |     |    |                    |
| Was the right intervention used?                              |     |    |                    |
| Was relevant and adequate documentation made?                 |     |    |                    |
| Others (specify):                                             |     |    |                    |

**SECTION 7: PLAN OF ACTION**

| ACTION POINT | PERSON RESPONSIBLE | TIMEFRAME |
|--------------|--------------------|-----------|
|              |                    |           |
|              |                    |           |
|              |                    |           |
|              |                    |           |
|              |                    |           |
|              |                    |           |

**Comments:**

.....

.....

.....

.....

.....

.....

.....

.....

.....

.....

.....

.....

.....

.....

.....

.....

.....

.....

.....

.....

.....

.....

**Form Completed by:**

Name: ..... Sign: ..... Date: .....
